# Supplementary material for: Facile approaches to build ordered amphiphilic tris(phthalocyaninato) europium triple-decker complex thin films and their comparative performances in ozone sensing
Source: Royal Society of Chemistry journal article supplement (doi:10.1039/c0cp00381f), 2010-01-01
Supplement: c0cp00381f.pdf [file c0cp00381f.pdf]

## **Electronic supplementary information**

**Facile Approaches to built Ordered Amphiphilic Tris(phthalocyaninato)**

**Europium Triple-Decker Complex Thin Films and their comparative**

**performances as the ozone sensor**

Yanli Chen, Marcel Bouvet\*, Thibaut Sizum, Yingning Gao, Cedric Plassard, Eric

Lesniewska and Jianzhuang Jiang\*

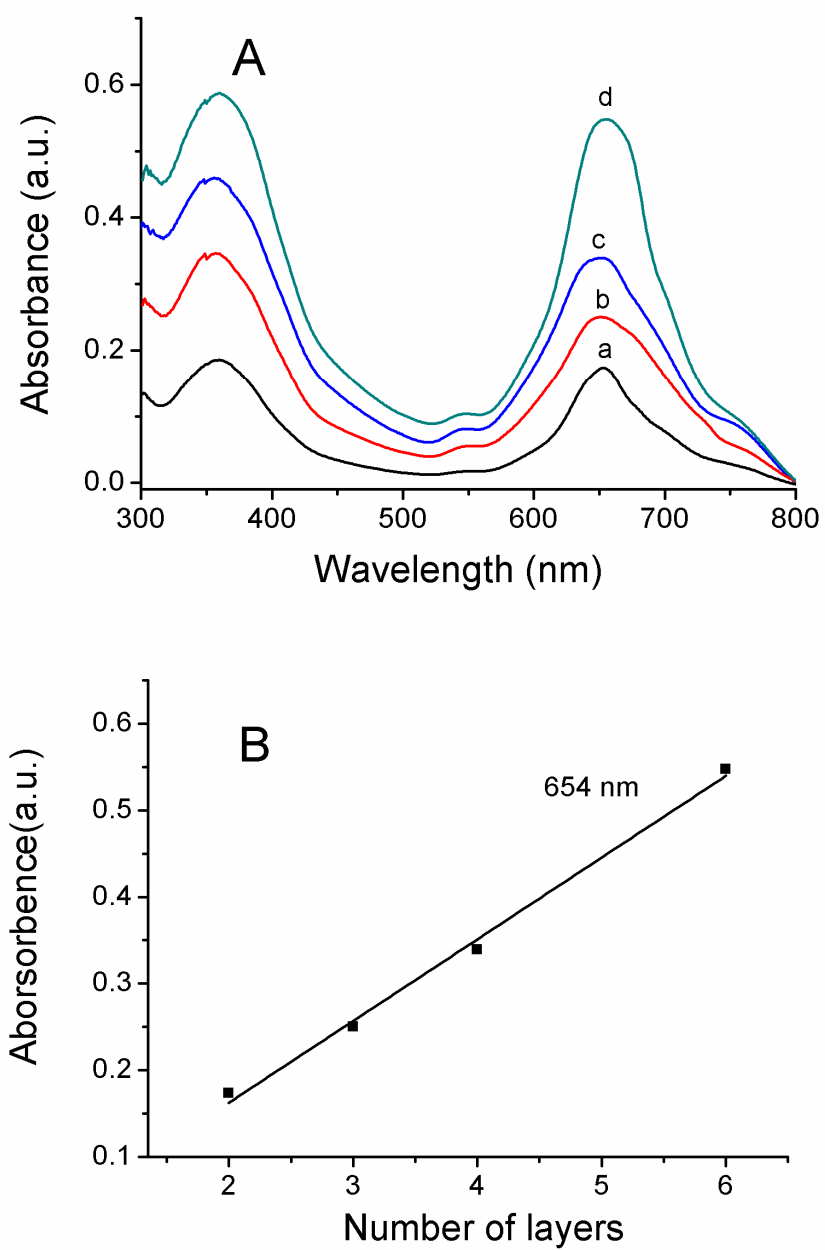

**Fig. S1** (A) UV-vis spectra of QLS Eu<sub>2</sub>[Pc(15C5)<sub>4</sub>]<sub>2</sub>[Pc(OC<sub>10</sub>H<sub>21</sub>)<sub>8</sub>] films (a-d), (a: 2 layers; b: 3 layers; c: 4 layers; d: 6 layers). (B) The relationship between the absorption intensity at 654 nm and the number of layers.

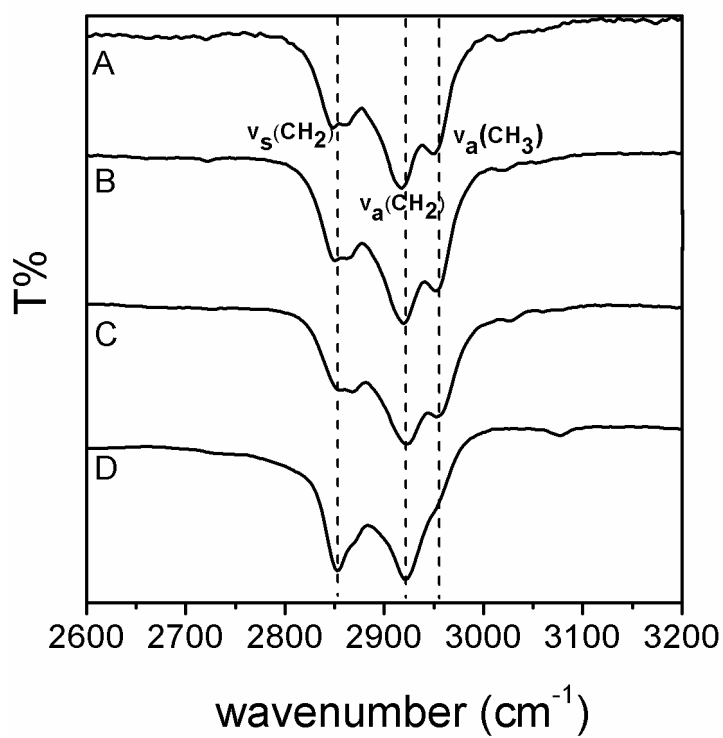

**Fig. S2** FTIR in ATR mode spectra of (A) SA films; (B) QLS films; (C) cast films and (D) bulk  $\text{Eu}_2[\text{Pc}(\text{15C5})_4]_2[\text{Pc}(\text{OC}_{10}\text{H}_{21})_8]$  adsorbed at ITO/glass substrates in the region of 2600-3200  $\text{cm}^{-1}$  with 2  $\text{cm}^{-1}$  resolution.

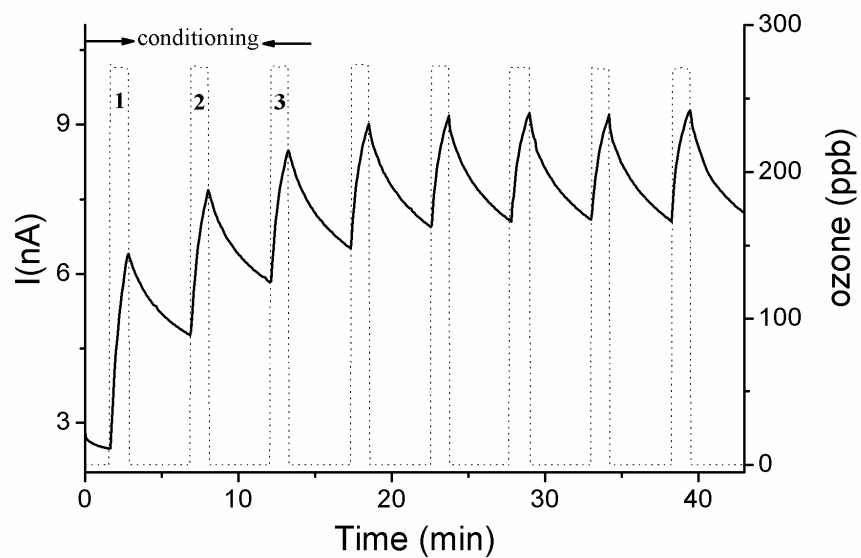

**Fig. S3.** Alternation of exposure and static recovery periods showing the conditioning stage(cycles 1–3) which is a prerequisite to obtain reproducible measurements of cast  $\text{Eu}_2[\text{Pc}(\text{15C5})_4]_2[\text{Pc}(\text{OC}_{10}\text{H}_{21})_8]$  films.(similar situation took place for another two types of films and have been omitted for clarity). Dotted line: concentration of ozone.

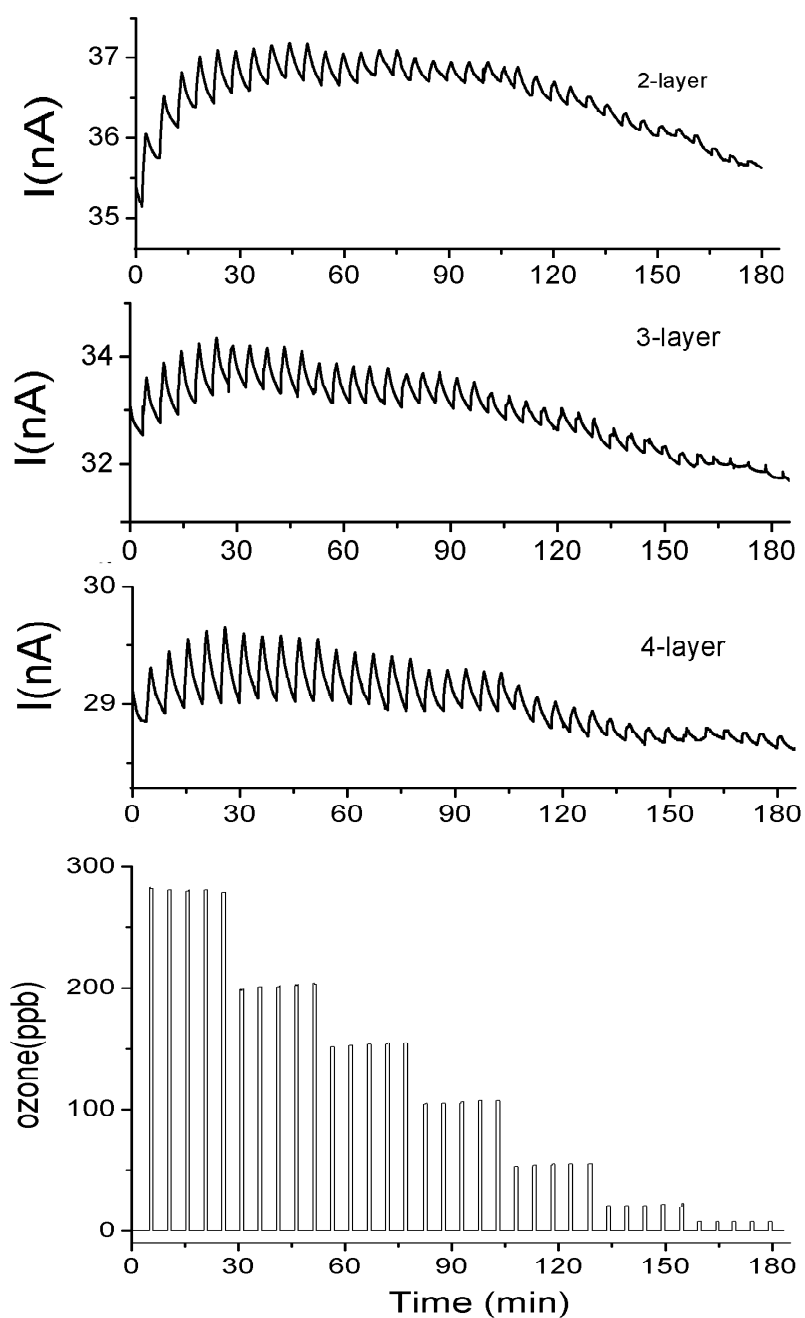

**Fig. S4** The time-dependent current plots for 2-4 layers of QLS  $\text{Eu}_2[\text{Pc}(15\text{C}5)_4]_2[\text{Pc}(\text{OC}_{10}\text{H}_{21})_8]$  films exposed to  $\text{O}_3$  at varied concentration in the range of 0-300 ppb( exposure:1min, recovery: 4 min), while the bottom rectangular pulses represent the  $\text{O}_3$  concentration as a function of time.

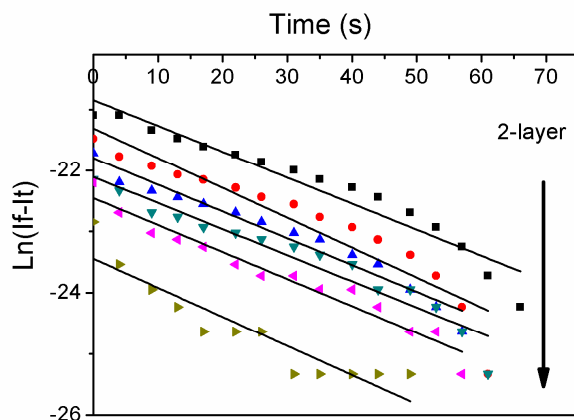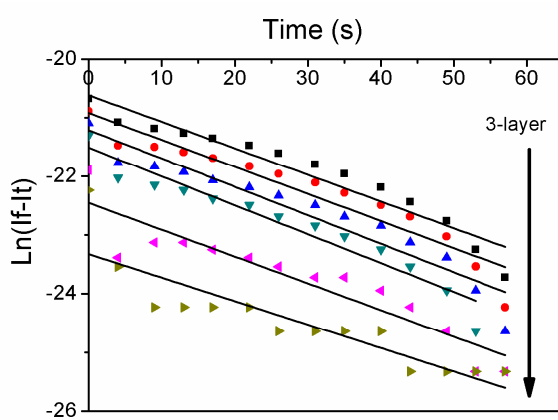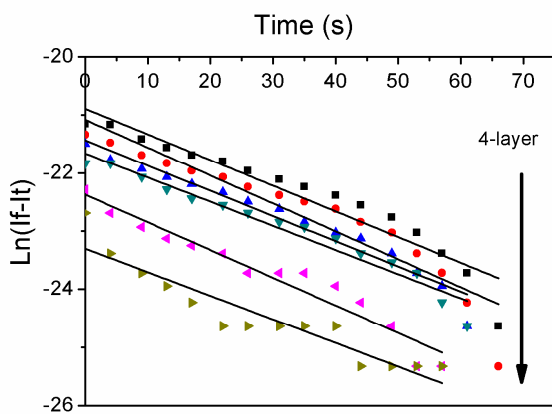

**Fig. S5** The kinetics plots of 2-4 layers of QLS  $\text{Eu}_2[\text{Pc}(15\text{C}5)_4]_2[\text{Pc}(\text{OC}_{10}\text{H}_{21})_8]$  films:  $\ln(I_f - I_t)$  versus time is predominantly linear for different concentration of  $\text{O}_3$ , suggesting first-order kinetics. Arrows indicate the direction of change with decreasing concentration of ozone.

**Table S1.** Characteristics of electrical conductivity and gas sensing behavior from three types of  $\text{Eu}_2[\text{Pc}(\text{15C5})_4]_2[\text{Pc}(\text{OC}_{10}\text{H}_{21})_8]$  films at room temperature.

| Type of films | film-thickness (nm)     | electrical conductivity ( $\text{S}\cdot\text{cm}^{-1}$ ) <sup>a</sup> | Sensor response (% ppb <sup>-1</sup> ) | Average sensor response rate constant ( $\text{s}^{-1}$ ) |
|---------------|-------------------------|------------------------------------------------------------------------|----------------------------------------|-----------------------------------------------------------|
| SA films      | 4.6 <sup>b</sup>        | ~more than $10^{-4}$ <sup>c</sup>                                      | 0.0376                                 | 0.0498                                                    |
| QLS films     | 4.42~13.26 <sup>d</sup> | $\sim 10^{-5}$                                                         | 0.0267 <sup>e</sup>                    | 0.0574                                                    |
| Cast films    | 92                      | $\sim 10^{-6}$ <sup>f</sup>                                            | 0.0721                                 | 0.0486                                                    |

<sup>a</sup> Calculated by Eq: (1) in experimental section

<sup>b</sup> Thickness was obtained by AFM measurement.

<sup>c</sup> Electrical conductivity was calculated with an estimated channel coverage less than 50% .

<sup>d</sup> Thickness was deduced from the value of layer spacing obtained by XRD and the number of layers in a 2-6 layers range.

<sup>e</sup> Calculated for 6-layer QLS films

<sup>f</sup> The thickness of electrode of 20nm is preferred since the thickness of cast films calculated is ca. 92nm.
